# Supplementary material for: Changes in Suicide Mortality for Veterans and Nonveterans by Gender and History of VHA Service Use, 2000–2010
Source: Atypon-hosted journal article supplement (doi:10.1176/appi.ps.201400031), 2015-05-01
Supplement: appi.ps.201400031.ds001.pdf [file appi.ps.201400031.ds001.pdf]

**Figure 1S.** Suicide Decedent Validation Process for Veteran Status

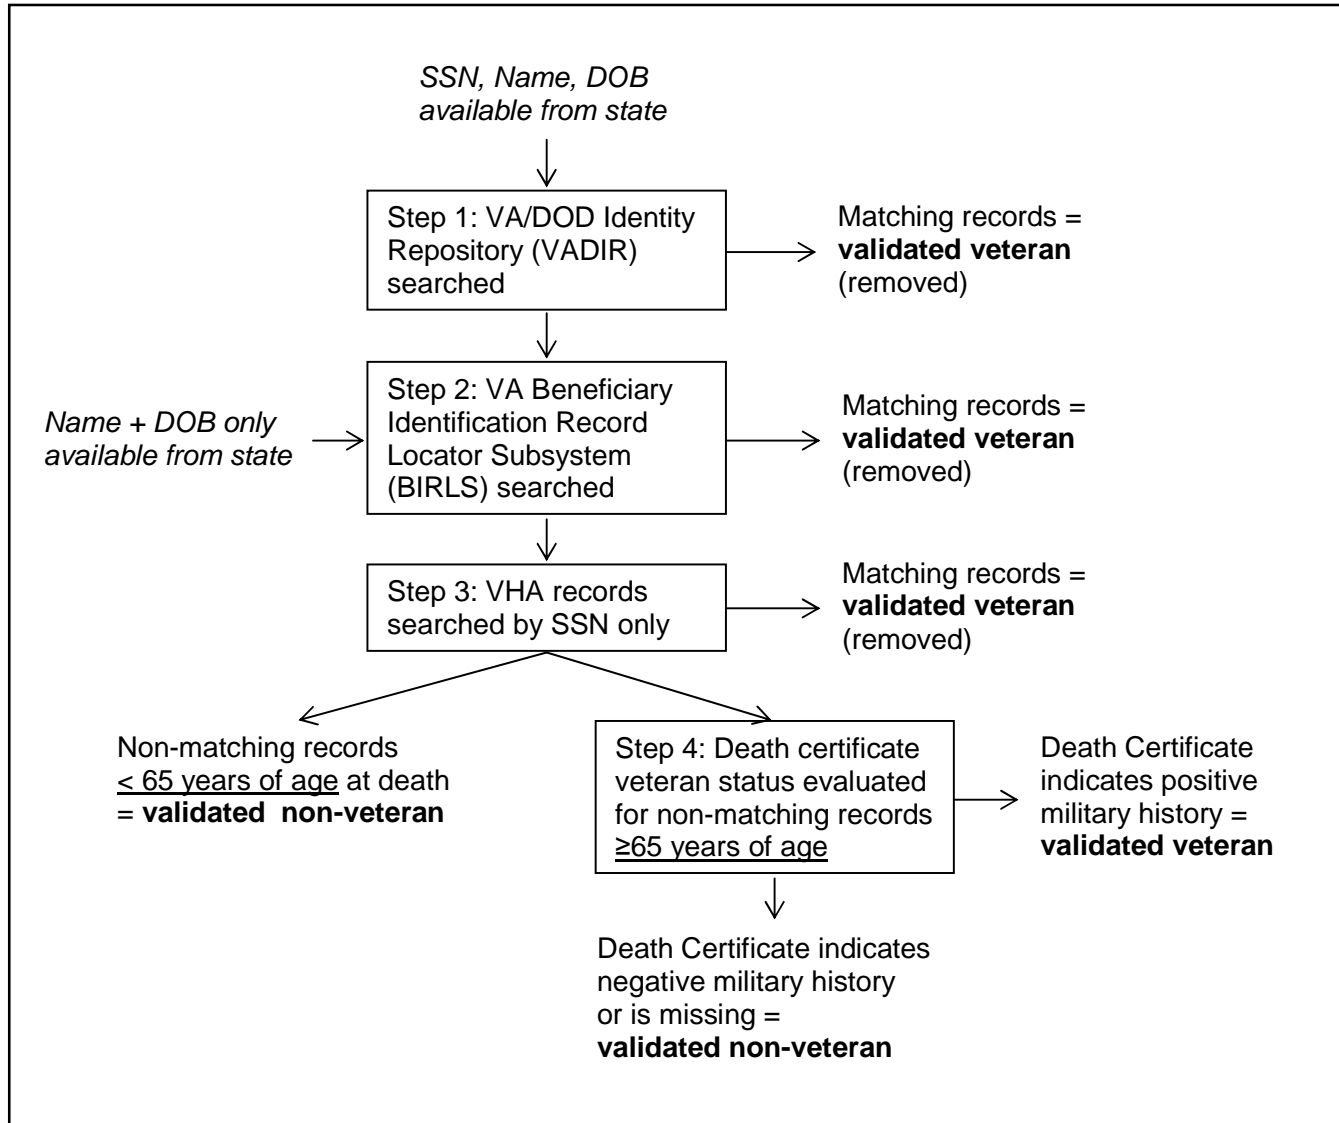

**Figure 2S.** Sensitivity analysis of gender-specific direct age-adjusted relative rate ratios versus standardized mortality ratios to compare Veteran and non-Veteran suicide rates across 23 states, 2000-2010

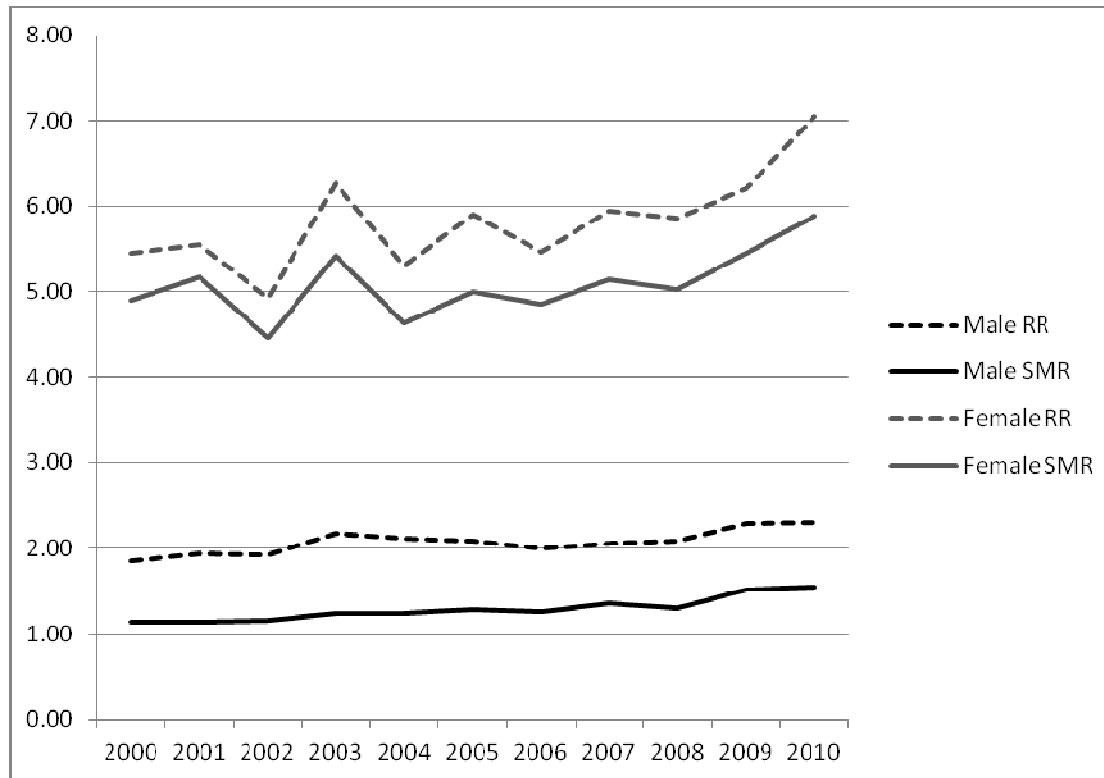

The 23 states included in this study are: New Jersey, New York, Pennsylvania, Rhode Island, Iowa, Kansas, Michigan, Minnesota, Nebraska, Alabama, Arkansas, Florida, Louisiana, North Carolina, Tennessee, Texas, West Virginia, Alaska, Idaho, Montana, Oregon, Utah, and Washington

**Table 1S.** Age Standardized Suicide Mortality Ratios for Veterans compared to Non-Veterans by Year and Gender

| Year | Total    |      |      |                  |           | Males    |      |      |      |           | Females |     |    |      |           |
|------|----------|------|------|------------------|-----------|----------|------|------|------|-----------|---------|-----|----|------|-----------|
|      | N        | O    | E    | SMR <sup>a</sup> | 95% CI    | N        | O    | E    | SMR  | 95% CI    | N       | O   | E  | SMR  | 95% CI    |
| 2000 | 13278669 | 3794 | 1416 | 1.19             | 1.10-1.28 | 12498575 | 3601 | 3162 | 1.14 | 1.05-1.23 | 780094  | 193 | 39 | 4.90 | 3.65-6.54 |
| 2001 | 13064182 | 3842 | 1429 | 1.18             | 1.10-1.27 | 12275815 | 3634 | 3230 | 1.13 | 1.04-1.22 | 788367  | 208 | 40 | 5.17 | 3.87-6.88 |
| 2002 | 12827234 | 3859 | 1437 | 1.19             | 1.11-1.28 | 12032271 | 3666 | 3197 | 1.15 | 1.06-1.24 | 794963  | 193 | 43 | 4.46 | 3.32-5.94 |
| 2003 | 12624648 | 3946 | 1381 | 1.30             | 1.21-1.40 | 11818484 | 3710 | 2992 | 1.24 | 1.15-1.34 | 806164  | 236 | 44 | 5.42 | 4.08-7.17 |
| 2004 | 12496571 | 3852 | 1383 | 1.30             | 1.20-1.40 | 11674301 | 3633 | 2919 | 1.24 | 1.15-1.34 | 822270  | 219 | 47 | 4.64 | 3.48-6.15 |
| 2005 | 12278056 | 3904 | 1366 | 1.34             | 1.24-1.44 | 11440541 | 3665 | 2865 | 1.28 | 1.18-1.38 | 837515  | 239 | 48 | 5.00 | 3.77-6.61 |
| 2006 | 12106871 | 3819 | 1358 | 1.32             | 1.22-1.42 | 11255666 | 3590 | 2846 | 1.26 | 1.16-1.36 | 851205  | 229 | 47 | 4.86 | 3.65-6.43 |
| 2007 | 11910491 | 3938 | 1359 | 1.43             | 1.32-1.54 | 11047668 | 3673 | 2709 | 1.36 | 1.25-1.47 | 862823  | 265 | 51 | 5.15 | 3.90-6.77 |
| 2008 | 12050718 | 4088 | 1451 | 1.37             | 1.27-1.47 | 11177045 | 3822 | 2936 | 1.30 | 1.21-1.41 | 873673  | 266 | 53 | 5.03 | 3.81-6.61 |
| 2009 | 11513684 | 4109 | 1319 | 1.60             | 1.48-1.72 | 10629378 | 3829 | 2522 | 1.52 | 1.41-1.64 | 884306  | 280 | 51 | 5.45 | 4.14-7.15 |
| 2010 | 11299133 | 4057 | 1299 | 1.63             | 1.58-1.68 | 10406760 | 3748 | 2439 | 1.54 | 1.49-1.59 | 892373  | 309 | 52 | 5.89 | 5.23-6.57 |

N = size of population at risk, O = observed deaths, E = expected deaths, SMR = Standardized Mortality Ratio, CI = Confidence Interval

<sup>a</sup>Total SMR is age- and gender-standardized

**Table 2S.** Age Standardized Suicide Mortality Ratios for VHA-Veterans compared to Non-VHA Veterans by Year and Gender

| Year | Total   |     |      |                  |           | Males   |     |     |      |           | Females |                |     |      |           |
|------|---------|-----|------|------------------|-----------|---------|-----|-----|------|-----------|---------|----------------|-----|------|-----------|
|      | N       | O   | E    | SMR <sup>a</sup> | 95% CI    | N       | O   | E   | SMR  | 95% CI    | N       | O <sup>b</sup> | E   | SMR  | 95% CI    |
| 2000 | 1877407 | 647 | 514  | 1.25             | 1.05-1.48 | 1698682 | 634 | 461 | 1.37 | 1.15-1.64 | 178725  | 13*            | 58  | 0.22 | 0.08-0.60 |
| 2001 | 2107088 | 682 | 588  | 1.15             | 0.97-1.37 | 1930472 | 662 | 531 | 1.25 | 1.05-1.49 | 176616  | 20             | 61  | 0.33 | 0.12-0.81 |
| 2002 | 2304330 | 739 | 648  | 1.12             | 0.95-1.33 | 2114944 | 716 | 594 | 1.20 | 1.01-1.43 | 189386  | 23             | 64  | 0.36 | 0.14-0.88 |
| 2003 | 2446626 | 714 | 736  | 0.96             | 0.81-1.14 | 2256368 | 698 | 668 | 1.05 | 0.88-1.24 | 190258  | 16*            | 74  | 0.22 | 0.08-0.56 |
| 2004 | 2542085 | 764 | 743  | 1.03             | 0.86-1.21 | 2343768 | 744 | 678 | 1.10 | 0.92-1.30 | 198317  | 20             | 67  | 0.30 | 0.11-0.75 |
| 2005 | 2617690 | 783 | 815  | 0.96             | 0.81-1.13 | 2411987 | 756 | 746 | 1.01 | 0.85-1.20 | 205703  | 27             | 71  | 0.38 | 0.15-0.92 |
| 2006 | 2649063 | 789 | 816  | 0.96             | 0.81-1.14 | 2437872 | 771 | 745 | 1.04 | 0.87-1.23 | 211191  | 18*            | 73  | 0.25 | 0.09-0.63 |
| 2007 | 2664079 | 768 | 883  | 0.87             | 0.73-1.03 | 2446379 | 747 | 801 | 0.93 | 0.78-1.11 | 217700  | 21             | 84  | 0.25 | 0.09-0.62 |
| 2008 | 2686979 | 830 | 897  | 0.93             | 0.78-1.10 | 2456679 | 808 | 806 | 1.00 | 0.84-1.19 | 230300  | 22             | 90  | 0.24 | 0.09-0.61 |
| 2009 | 2758958 | 831 | 993  | 0.84             | 0.71-0.99 | 2514208 | 803 | 889 | 0.90 | 0.76-1.07 | 244750  | 28             | 102 | 0.28 | 0.11-0.66 |
| 2010 | 2844529 | 785 | 1056 | 0.74             | 0.69-0.79 | 2597248 | 757 | 942 | 0.80 | 0.75-0.86 | 247281  | 28             | 117 | 0.24 | 0.16-0.34 |

N = size of population at risk, O = observed deaths, E = expected deaths, SMR = Standardized Mortality Ratio, CI = Confidence Interval

<sup>a</sup> Total SMR is age- and gender-standardized

<sup>b</sup> The number of suicides observed for female VHA Veterans in 2000, 2003, and 2006 is less than 20 warranting caution when interpreting SMRs for female VHA Veterans in these years.
